# Supplementary material
Source: Springer Nature journal article supplement (https://www.springermedizin.de/resource/supplementary/12877_2009_188_MOESM2_ESM.pdf/9441358)
Supplement: MOESM2 [file 9441358]

**Table 2. Service use and change in care needs levels in the lower care needs level group (n=492)**

| <i>Service use</i>                                                    | Change in care needs level                            |                                            | $\chi^2$ | p-value |
|-----------------------------------------------------------------------|-------------------------------------------------------|--------------------------------------------|----------|---------|
|                                                                       | Sustained or Improved<br>(SI group)<br>n=405<br>n (%) | Deteriorated<br>(D group)<br>n=87<br>n (%) |          |         |
| Home help <sup>†</sup>                                                | 128 (32)                                              | 30 (34)                                    | 0.27     | 0.602   |
| Home bath service <sup>††</sup>                                       | 5 (1)                                                 | 1 (1)                                      |          | 0.948   |
| Visiting nurse <sup>†</sup>                                           | 27 (7)                                                | 9 (10)                                     | 1.43     | 0.232   |
| Home rehabilitation <sup>††</sup>                                     | 5 (1)                                                 | 1 (1)                                      |          | 0.948   |
| Nursing home daycare <sup>†</sup>                                     | 273 (67)                                              | 69 (79)                                    | 4.79     | 0.029*  |
| Health daycare <sup>†</sup>                                           | 72 (18)                                               | 11 (13)                                    | 1.35     | 0.246   |
| Loan of devices <sup>†</sup>                                          | 129 (32)                                              | 30 (34)                                    | 0.23     | 0.634   |
| Respite stay in a nursing home <sup>†</sup>                           | 79 (20)                                               | 42 (48)                                    | 31.96    | <0.001* |
| Respite stay in health care facilities <sup>††</sup>                  | 17 (4)                                                | 5 (6)                                      |          | 0.526   |
| Respite stay in sanatorium-type medical care facilities <sup>††</sup> | 0 (0)                                                 | 2 (2)                                      |          | 0.031*  |
| Medical management by a physician <sup>††</sup>                       | 6 (1)                                                 | 3 (3)                                      |          | 0.201   |
| Number of kinds of care services used <sup>†††</sup>                  |                                                       |                                            |          |         |
|                                                                       | 0                                                     | 4 (1)                                      | 4 (5)    |         |
|                                                                       | 1                                                     | 170 (42)                                   | 19 (22)  |         |
|                                                                       | 2                                                     | 146 (36)                                   | 29 (33)  |         |
|                                                                       | 3                                                     | 68 (17)                                    | 18 (21)  |         |
|                                                                       | 4                                                     | 11 (3)                                     | 14 (16)  |         |
|                                                                       | 5                                                     | 5 (1)                                      | 2 (2)    |         |
|                                                                       | 6                                                     | 1 (0)                                      | 1 (1)    | <0.001* |

\* p<0.05

†  $\chi^2$  test

†† Fisher's exact test

††† Wilcoxon rank-sum test
